# Supplementary material
Source: publisher figshare collection journal article supplement (https://gsajournals.figshare.com/ndownloader/files/18509888)
Supplement: Supplementary file 1 [file 18509888]

## Sheet: Reference vs GZ002 strain 
Type	Reference	Reference Position	Variant length (bp)	Subject	Subject position
Insertion	NC_010397.1	2896548	60	MabS	31829

## Sheet: Reference vs GZ0 1
Type	Reference	Reference Position	Variant length (bp)	Subject	Subject position
Insertion	NC_010397.1	1754370	28	MabR	2219663
Insertion	NC_010397.1	1825776	2416	MabR	2210012
Insertion	NC_010397.1	2041771	5745	MabR	1991594
Insertion	NC_010397.1	2061303	120	MabR	1966314
Insertion	NC_010397.1	2100526	16	MabR	1935461
Insertion	NC_010397.1	2624538	9493	MabR	1411461
Insertion	NC_010397.1	2896544	60	MabR	1129950
Insertion	NC_010397.1	2968862	3396	MabR	1057575
Insertion	NC_010397.1	3537989	29132	MabR	485052
Insertion	NC_010397.1	4093665	33	MabR	4975788
Insertion	NC_010397.1	4519106	44655	MabR	4550304
Insertion	NC_010397.1	4658368	23	MabR	4366392
Insertion	NC_010397.1	4658439	5882	MabR	4366321
Deletion	NC_010397.1	3538018	28	MabR	455919
Deletion	NC_010397.1	2100564	37	MabR	1935444
Deletion	NC_010397.1	2095289	8273	MabR	1940717
Deletion	NC_010397.1	2067625	224	MabR	1960090
Deletion	NC_010397.1	1816154	61783	MabR	2219634
Deletion	NC_010397.1	250045	16531	MabR	3724044
Deletion	NC_010397.1	4664322	5882	MabR	4360438
Deletion	NC_010397.1	4658392	23	MabR	4366368

## Sheet: GZ002  vs GZ0 1
Type	Reference	Reference position	Variant Length (bp)	Subject	Subject position
Insertion	MabS	1935448	28	MabR	4303074
Insertion	MabS	1940716	8274	MabR	4297806
Insertion	MabS	1960090	224	MabR	4270141
Insertion	MabS	2219611	61759	MabR	4018693
Insertion	MabS	3724008	16531	MabR	2452597
Insertion	MabS	4360471	5843	MabR	1799632
Insertion	MabS	4366355	57	MabR	1793748
Deletion	MabS	1057597	3396	MabR	104180
Deletion	MabS	485002	29108	MabR	673381
Deletion	MabS	4975821	34	MabR	1228974
Deletion	MabS	4550284	44654	MabR	1654469
Deletion	MabS	4366413	57	MabR	1793690
Deletion	MabS	4366315	5843	MabR	1793788
Deletion	MabS	2210017	2416	MabR	4028287
Deletion	MabS	1991574	5748	MabR	4244307
Deletion	MabS	1966315	120	MabR	4263818
Deletion	MabS	1411458	9492	MabR	4827057
